# Supplementary material for: High-Value Plant Species Used for the Treatment of “Fever” by the Karen Hill Tribe People
Source: PubMed Central journal article supplement (PMC7277386; doi:10.3390/antibiotics9050220), 2020-04-29
Supplement: antibiotics-09-00220-s001.pdf [file antibiotics-09-00220-s001.pdf]

# Supplementary Materials 1

## High value plant species used to treat 'fever' by the Karen hill-tribe people: A meta-analysis

Methee Phumthum and Nicholas J. Sadgrove

### List of data sources

Anderson, E.F. *Plants and People of the Golden Triangle Ethnobotany of the Hill Tribes of Northern Thailand*. Timber Press, Inc., Southwest Portland. 1993.

Junkhonkaen, J. *ethnobotany of Ban Bowee, Amphoe Suan Phueng, Changwat Ratchaburi*. Master thesis, Kasetsart University, Bangkok. 2012.

Junsongduang, A. *Roles and importance of sacred Forest in biodiversity conservation in Mae Chaem District, Chiang Mai Province*. PhD thesis, Chiang Mai University, Chiang Mai. 2014.

Kaewsangchai, S. *Ethnobotany of Karen in Khun Tuen Noi Village, Mae Tuen Sub-district, Omkoi District, Chiang Mai Province*. Master thesis. Chiang Mai University, Chiang Mai. 2017.

Kamwong, K. *Ethnobotany of Karens at Ban Mai Sawan and Ban Huay Pu Ling, Ban Luang Sub-District, Chom Thong District, Chiang Mai Province*. Master thesis. Chiang Mai University, Chiang Mai. 2010.

Kantasrila, R. *Ethnobotany fo Karen at Ban Wa Do Kro, Mae Song Sub-district, Tha Song Yang District, Tak Province*. Master thesis. Chiang Mai University, Chiang Mai. 2016.

Klibai, A. 2013. *Self-care with indigenous medicine of long-eared Karen ethnic group: Case study Ban Mae Sin, Ban Kang Pinjai, Ban Slok, Wang Chin district, Phrae province*. Master thesis, Surin Rajabhat University, Surin.

Mahawongsanan, A. *Change of herbal plants utilization of the Pgn K'nyau : A case study of Ban Huay Som Poy, Mae Tia Watershed, Chom Thong District, Chiang Mai Province*. Master thesis, Biology. Chiang Mai University, Chiang Mai. 2008.

Prachuabaree, L. *Medicinal plants of Karang hill tribe in Baan Pong-lueg, Kaeng Krachan District, Phetchaburi Province*. Master thesis, Pharmacy. Silpakorn University, Nakhonpathom. 2008.

Pongamornkul, W. *An ethnobotanical study of the Karen at Ban Yang Pu Toh and Ban Yang Thung Pong, Chiang Dao district, Chiang Mai province*. Chiang Mai University, Chiang Mai. 2003.

Puling, W. *Ethnobotany of Karen for studying medicinal plants at Angka Noi and Mae Klang villages, Chomthong district, Chiang Mai*. Bachelor degree thesis, Biology. Chiang Mai University, Chiang Mai. 2001.

Sonsupub, B. *Ethnobotany of karen community in Raipa village, Huaykhayeng subdistrict, Thongphahpume district, Kanchanaburi province*. Master thesis. Kasetsart University, Bangkok. 2010.

Sukkho, T. *A survey of medicinal plants used by Karen people at Ban Chan and Chaem Luang Subdidtricts, Mae Chaem district, Chiang Mai province*. Chiang Mai University, Chiang Mai. 2008.

Sutjaritjai, N.; Wangpakapattanawong, P.; Balslev, H.; Inta, A. Sutjaritjai, N., P. Wangpakapattanawong, H. Balslev and A. Inta (2019). "Traditional Uses of Leguminosae among the Karen in Thailand. *Plants*. 2019; 8(12). <https://doi.org/10.3390/plants8120600>

Trisonthi, S.; Trisonthi, P. Ethnobotany of Karen in Mae Hae Nua village, Mae Na Jorn subdistrict, Mae Chaem district, Chiang Mai. Scientific report. CU Library, Bangkok. 1995.

Winijchaiyanan, P. Ethnobotany of Karen in Chiang Mai. Master thesis, Biology. Chiang Mai University Library, Chiang Mai. 1995.

## Supplementary Materials 2

# High value plant species used to treat 'fever' by the Karen hill-tribe people: A meta-analysis

Methee Phumthum and Nicholas J. Sadgrove

**Table S1.** CI values of medicinal plant families used for fever treatment by 25 Karen villages in Thailand.

| Family         | CI   |
|----------------|------|
| Acanthaceae    | 0.4  |
| Acoraceae      | 0.12 |
| Adoxaceae      | 0.04 |
| Amaryllidaceae | 0.08 |
| Anacardiaceae  | 0.04 |
| Annonaceae     | 0.08 |
| Apiaceae       | 0.08 |
| Apocynaceae    | 0.24 |
| Araceae        | 0.12 |
| Asparagaceae   | 0.16 |
| Asteraceae     | 0.44 |
| Bignoniaceae   | 0.12 |
| Burseraceae    | 0.04 |
| Cannabaceae    | 0.08 |
| Chloranthaceae | 0.08 |
| Clusiaceae     | 0.04 |
| Euphorbiaceae  | 0.24 |
| Hernandiaceae  | 0.04 |
| Hypoxidaceae   | 0.04 |
| Iridaceae      | 0.08 |
| Lamiaceae      | 0.32 |
| Lauraceae      | 0.16 |
| Leguminosae    | 0.72 |
| Loranthaceae   | 0.12 |
| Malvaceae      | 0.2  |

|                  |      |
|------------------|------|
| Melastomataceae  | 0.12 |
| Meliaceae        | 0.12 |
| Menispermaceae   | 0.16 |
| Moraceae         | 0.04 |
| Musaceae         | 0.04 |
| Oleaceae         | 0.04 |
| Phyllanthaceae   | 0.12 |
| Plantaginaceae   | 0.16 |
| Plumbaginaceae   | 0.04 |
| Poaceae          | 0.08 |
| Polygalaceae     | 0.04 |
| Polypodiaceae    | 0.04 |
| Ranunculaceae    | 0.04 |
| Rubiaceae        | 0.16 |
| Rutaceae         | 0.36 |
| Salicaceae       | 0.04 |
| Santalaceae      | 0.04 |
| Saururaceae      | 0.04 |
| Simaroubaceae    | 0.12 |
| Smilacaceae      | 0.08 |
| Solanaceae       | 0.04 |
| Staphyleaceae    | 0.04 |
| Tectariaceae     | 0.04 |
| Theaceae         | 0.08 |
| Thymelaeaceae    | 0.04 |
| Vitaceae         | 0.04 |
| Xanthorrhoeaceae | 0.04 |

**Table S2** Plant part used and CI values of medicinal plant families used for fever treatment by 25 Karen villages in Thailand

| Species                                          | Part used    | CI   |
|--------------------------------------------------|--------------|------|
| <i>Acacia rugata</i> (Lam.) Fawc. & Rendle       | Leaves       | 0.08 |
| <i>Acalypha spiciflora</i> Burm.f.               | Stems        | 0.04 |
| <i>Acorus calamus</i> L.                         | Entire plant | 0.12 |
| <i>Aglaiia lawii</i> (Wight) C.J.Saldanha        | Roots        | 0.04 |
| <i>Allium ascalonicum</i> L.                     | Stems        | 0.04 |
| <i>Aloe vera</i> (L.) Burm.f.                    | Leaves       | 0.04 |
| <i>Alstonia rostrata</i> C. E. C. Fisch.         | Barks        | 0.08 |
| <i>Alstonia scholaris</i> (L.) R. Br.            | Barks        | 0.08 |
| <i>Andrographis paniculata</i> (Burm.f.) Nees    | Entire plant | 0.08 |
| <i>Aquilaria crassna</i> Pierre ex Lecomte       | Barks        | 0.04 |
| <i>Archidendron clypearia</i> (Jack) I.C.Nielsen | Leaves       | 0.08 |
| <i>Artemisia atrovirens</i> Hand.-Mazz.          | Entire plant | 0.04 |
| <i>Aspidistra elatior</i> Blume                  |              | 0.04 |
| <i>Azadirachta indica</i> A.Juss.                | Leaves       | 0.04 |
| <i>Blumea balsamifera</i> (L.) DC.               | Entire plant | 0.08 |

|                                                                                   |              |      |
|-----------------------------------------------------------------------------------|--------------|------|
| <i>Caesalpinia sappan</i> L.                                                      |              | 0.04 |
| <i>Calophyllum polyanthum</i> Wall.<br>ex Planch. & Triana                        | Barks        | 0.04 |
| <i>Camellia sinensis</i> (L.) Kuntze                                              | Leaves       | 0.04 |
| <i>Cassytha filiformis</i> L.                                                     | Entire plant | 0.08 |
| <i>Cayratia pedata</i> (Lam.)<br>Gagnep.                                          | Entire plant | 0.04 |
| <i>Celtis tetrandra</i> Roxb.                                                     | Stems        | 0.04 |
| <i>Celtis timorensis</i> Span.                                                    | Barks        | 0.04 |
| <i>Litsea monopetala</i> (Roxb.) Pers.                                            | Shoot        | 0.04 |
| <i>Mallotus philippensis</i> (Lam.)<br>Müll.Arg.                                  | Stems        | 0.04 |
| <i>Mayodendron igneum</i> (Kurz)<br>Kurz                                          | Barks        | 0.04 |
| <i>Melastoma sanguineum</i> Sims.                                                 | Stems        | 0.04 |
| <i>Melicope glomerata</i> (W. G.<br>Craib) T.G. Hartley                           | Stems        | 0.12 |
| <i>Memecylon pauciflorum</i> Blume                                                | Leaves       | 0.04 |
| <i>Micromelum integerrimum</i><br>(Buch.-Ham. ex DC.) Wight<br>& Arn. ex M. Roem. | Leaves       | 0.04 |
| <i>Millingtonia hortensis</i> L.f.                                                | Aerial parts | 0.04 |
| <i>Mimosa diplotricha</i> Sauvalle                                                | Entire plant | 0.04 |
| <i>Mimosa pigra</i> L.                                                            | Entire plant | 0.08 |
| <i>Mimosa pudica</i> L.                                                           | Entire plant | 0.16 |
| <i>Molineria capitulata</i> (Lour.)<br>Herb.                                      | Roots        | 0.04 |
| <i>Musa acuminata</i> Colla                                                       | Stems        | 0.04 |
| <i>Nyctocalos brunfelsiiflora</i><br>Teijsm. & Binn.                              | Entire plant | 0.04 |
| <i>Oenanthe javanica</i> (Blume)<br>DC.                                           | Shoot        | 0.04 |
| <i>Osbeckia chinensis</i> L.                                                      | Entire plant | 0.04 |
| <i>Peliosanthes caesia</i> J.M.H.Shaw                                             | Entire plant | 0.04 |
| <i>Peliosanthes macrophylla</i> Wall.<br>ex Baker                                 | Roots        | 0.04 |
| <i>Phlogacanthus curviflorus</i><br>(Wall.) Nees                                  | Entire plant | 0.04 |
| <i>Phyllanthus amarus</i><br>Schumach. & Thonn.                                   | Entire plant | 0.12 |
| <i>Physalis minima</i> L.                                                         | Entire plant | 0.04 |
| <i>Picrasma javanica</i> Blume                                                    | Barks        | 0.08 |
| <i>Plantago major</i> L.                                                          | Leaves       | 0.04 |
| <i>Platycerium wallichii</i> Hook.                                                | Entire plant | 0.04 |
| <i>Plectranthus amboinicus</i><br>(Lour.) Spreng.                                 | Leaves       | 0.04 |
| <i>Plumbago indica</i> L.                                                         | Entire plant | 0.04 |
| <i>Plumeria obtusa</i> L.                                                         | Leaves       | 0.04 |
| <i>Polygala arillata</i> Buch.-Ham.<br>ex D. Don                                  | Roots        | 0.04 |
| <i>Pothos chinensis</i> (Raf.) Merr.                                              | Entire plant | 0.08 |
| <i>Pothos scandens</i> L.                                                         | Entire plant | 0.04 |

|                                                           |              |      |
|-----------------------------------------------------------|--------------|------|
| <i>Psychotria yunnanensis</i> Hutch.                      | Entire plant | 0.04 |
| <i>Pteridrys syrmatica</i> (Willd.) C.<br>Chr. & Ching    | Rhizome      | 0.04 |
| <i>Rothea serrata</i> (L.) Steane &<br>Mabb.              | Entire plant | 0.08 |
| <i>Sambucus javanica</i> Blume                            |              | 0.04 |
| <i>Sarcandra glabra</i> (Thunb.)<br>Nakai                 | Entire plant | 0.04 |
| <i>Scadoxus multiflorus</i> (Martyn)<br>Raf.              | Stems        | 0.04 |
| <i>Schima wallichii</i> Choisy                            | Roots        | 0.04 |
| <i>Scoparia dulcis</i> L.                                 | Roots        | 0.12 |
| <i>Scurrula ferruginea</i> (Jack)<br>Danser               | Entire plant | 0.04 |
| <i>Senna hirsuta</i> (L.) H.S.Irwin &<br>Barneby          | Entire plant | 0.04 |
| <i>Sida acuta</i> Burm.f.                                 | Entire plant | 0.08 |
| <i>Sida cordifolia</i> L.                                 | Entire plant | 0.04 |
| <i>Sida rhombifolia</i> L.                                | Entire plant | 0.08 |
| <i>Smilax glabra</i> Roxb.                                | Roots        | 0.04 |
| <i>Smilax luzonensis</i> C.Presl                          | Rhizome      | 0.04 |
| <i>Spondias pinnata</i> (L. f.) Kurz                      | Barks        | 0.04 |
| <i>Streblus asper</i> Lour.                               | Leaves       | 0.04 |
| <i>Strobilanthes cusia</i> (Nees)<br>Kuntze               | Leaves       | 0.08 |
| <i>Tadehagi triquetrum</i> (L.)<br>H.Ohashi               | Entire plant | 0.08 |
| <i>Tamarindus indica</i> L.                               | Shoot        | 0.04 |
| <i>Thunbergia coccinea</i> Wall.                          | Entire plant | 0.04 |
| <i>Thunbergia laurifolia</i> Lindl.                       | Aerial parts | 0.08 |
| <i>Thysanolaena latifolia</i> (Roxb.<br>ex Hornem.) Honda | Roots        | 0.04 |
| <i>Tiliacora triandra</i> Diels                           | Roots        | 0.04 |
| <i>Tinospora baenzigeri</i> Forman                        | Stems        | 0.04 |
| <i>Tinospora crispa</i> (L.) Hook. f.<br>& Thomson        | Stems        | 0.04 |
| <i>Triadica cochinchinensis</i> Lour.                     | Stems        | 0.04 |
| <i>Turpinia pomifera</i> (Roxb.) DC.                      | Roots        | 0.04 |
| <i>Viscum articulatum</i> Burm. f.                        | Entire plant | 0.04 |
| <i>Vitex trifolia</i> L.                                  | Leaves       | 0.08 |
